# Supplementary material
Source: Elsevier journal article supplement (https://www.sciencedirect.com/science/article/pii/S0210569118303310)
Supplement: mmc1 [file S0210569118303310:mmc1.pdf]

## **MATERIAL SUPLEMENTARIO**

### **CONSENTIMIENTO PARA FAMILIARES QUE CONTESTEN LA ENCUESTA DE OPINIÓN SOBRE EL RÉGIMEN DE VISITAS DE UCI**

Le invitamos a que participe en un estudio, promovido por el servicio de medicina intensiva del Hospital de Galdakao-Usansolo, (enfermería y facultativos). Este estudio ha sido evaluado por el Comité Ético de Investigación Clínica de dicho hospital.

El objetivo del estudio es conocer la opinión de los usuarios (familiares y pacientes) y profesionales sobre el régimen de visitas en la unidad de cuidados intensivos del Hospital de Galdakao-Usansolo (OSI Barrualde-Galdakao).

Para ello, conocer su opinión como familiar directo de un paciente ingresado en la Unidad de Cuidados Intensivos, nos es de gran ayuda y valor, tanto para el objeto del estudio como para mejorar nuestro trabajo.

La recogida y tratamiento de todos los datos se llevará a cabo de acuerdo con lo establecido en la Ley Orgánica 15/1999 de Protección de Datos de Carácter Personal. Si los resultados de este estudio llegan a publicarse, su identidad será absolutamente confidencial.

Su participación en el estudio es totalmente voluntaria, pudiendo retirarse del mismo en cualquier momento y sin dar explicaciones. Participe en el estudio o no, la atención que reciba tanto usted como su familiar no se verá afectada en absoluto.

Si desea más información puede contactar en el tfno.: 94 400 7019

## ENCUESTA DE OPINIÓN DIRIGIDA A FAMILIARES DE PACIENTES DE UCI SOBRE EL RÉGIMEN DE VISITAS EN LA UNIDAD

### Datos socio demográficos y personales:

Edad:

Sexo:

Estado civil:

Número de hijos:

Lugar del domicilio:

Kilómetros de su domicilio al hospital:

Fecha de Ingreso en UCI:

Fecha de alta de UCI:

Días de estancia en UCI:

### CUESTIONES PREVIAS

1.- ¿Habías visitado anteriormente algún familiar en una UCI?

**SÍ**\_\_\_ **NO**\_\_\_

2.- ¿Estás satisfecho/o con el actual sistema de visitas?

**SÍ**\_\_\_ **NO**\_\_\_

3.- ¿Te parece que se debería cambiar el horario actual de visitas?

**SI**\_\_\_ **NO**\_\_\_

**En caso afirmativo expón los motivos**-----

-----  
-----

4.- ¿Cómo valoras el tiempo destinado a la visita de familiares y allegados en ésta Unidad?

1. Muy escaso

2. Escaso

3. Adecuado
4. Amplio
5. Muy amplio

5.-¿Cuál sería en tu opinión el horario de visitas más adecuado?

1. Restringir el actual.
2. Mantener el actual.
3. Ampliar a 2 horas por la mañana y 2 horas por la tarde.
4. Ampliar desde las 13.00 horas hasta las 21:00 horas, es decir juntar las 2 visitas actuales.
5. Horario libre.

#### **CUESTIONES GENERALES**

Dinos tu grado de conformidad con las siguientes cuestiones, **evaluándolas del 1 al 5** , siendo:

**1 muy en desacuerdo**

**2 en desacuerdo**

**3 neutral**

**4 de acuerdo**

**5 muy de acuerdo**

**0 no sabe/ no contesta**

- 1.- ¿Crees que el paciente desea más tiempo de visita de sus familiares y allegados?
- 2.- ¿Cómo familiar habrías deseado más tiempo de visita al paciente?
- 3.- ¿Crees que es bueno para los pacientes un mayor tiempo de visita?
- 4.- ¿Crees que es bueno para los familiares y allegados un mayor tiempo de visita?

- 5.- ¿Crees que la presencia de los familiares favorece la recuperación del paciente?
- 6.- ¿Crees que la presencia de familiares genera problemas con el personal de la UCI?
- 7.- ¿Crees que se debe permitir la visita de menores en la UCI?
- 8.- ¿Crees que se debe permitir la libre permanencia de familiares o allegados cuando un paciente está cercano a su fallecimiento?
- 9.- ¿Crees que se debe permitir la libre permanencia de familiares o allegados cuando un paciente lo necesita?
- 10.- ¿Crees que se debe permitir la visita fuera de horario de familiares o allegados cuando estos no pueden acudir en los horarios prefijados?
- 11.- Estarías de acuerdo en que el horario de visitas fuera libre desde las 13:00 horas hasta las 21:00 horas?
- 12.-¿Crees que se debe permitir la presencia de un familiar durante la noche?
- 13.-¿Crees que la flexibilización del horario de visitas de UCI conllevaría una pérdida de la intimidad de los pacientes?

**En caso de ingreso en UCI de tu familiar más cercano te gustaría acompañarlo en las siguientes situaciones?:**

**Valóralo del 1 al 5 siendo**

**1 MUY EN DESACUERDO**

**2 EN DESACUERDO**

**3 NEUTRAL**

**4 DE ACUERDO**

**5 MUY DE ACUERDO**

**0 NO SABE / NO CONTESTA**

**1.- Acompañarlo el mayor tiempo posible**

**2.- Cuando está dormido**

**3.- Cuando está despierto conectado a un respirador**

**4.-Cuando está en coma**

**5.- Cuando está dolorido**

**6.-Cuando está agitado**

**7.-Cuando está comiendo**

**8.-Cuando le están aseando**

**9.- Cuando hay que hacer algún acto médico poco agresivo como sacarle una analítica, cogerle una vía en el brazo, que le explore el médico, hacerle una ecografía....**

**12.-Cuando hay que hacerle maniobras más agresivas como cogerle una vía en el cuello, sedarle para ponerle un tubo por la boca, realizarle maniobras de reanimación cardiaca.....**

**EXPÓN LOS PROBLEMAS QUE EN TU OPINIÓN SE PUEDEN DERIVAR DE UN HORARIO DE VISITAS MÁS FLEXIBLE Y ABIERTO**

---

---

---

---

---

---

---

---

---

---

**EXPÓN TUS OBSERVACIONES, SUGERENCIAS Y POSIBLES PROPUESTAS PARA UN REGIMEN DE VISITAS MÁS ÓPTIMO**

---

---

---

---

---

---

---

---

**CONSENTIMIENTO PARA PACIENTES QUE CONTESTEN LA ENCUESTA DE OPINIÓN  
SOBRE EL RÉGIMEN DE VISITAS DE UCI**

Le invitamos a que participe en un estudio, promovido por el servicio de medicina intensiva del Hospital de Galdakao-Usansolo, (enfermería y facultativos). Este estudio ha sido evaluado por el Comité Ético de Investigación Clínica de dicho hospital.

El objetivo del estudio es conocer la opinión de los usuarios (familiares y pacientes) y profesionales sobre el régimen de visitas en la unidad de cuidados intensivos del Hospital de Galdakao-Usansolo (OSI Barrualde- Galdakao)

Para ello, usted como paciente ingresado en la Unidad de Cuidados Intensivos, debe consentir la recogida de algunos datos de interés para el estudio, de su historia clínica.

La recogida y tratamiento de todos los datos se llevará a cabo de acuerdo con lo establecido en la Ley Orgánica 15/1999 de Protección de Datos de Carácter Personal. Si los resultados de este estudio llegan a publicarse, su identidad será absolutamente confidencial.

Su participación en el estudio es totalmente voluntaria, pudiendo retirarse del mismo en cualquier momento y sin dar explicaciones. Participe en el estudio o no, la atención que reciba no se verá afectada en absoluto.

Si desea más información puede contactar con cualquiera de las investigador/as señaladas en el tfno.: 94 400 7019.

**Yo (Nombre y apellidos) .....con DNI.....,**

**He leído la información que se me ha entregado.**

**He podido hacer preguntas sobre el estudio.**

**He recibido suficiente información sobre el estudio.**

**Comprendo que la participación es voluntaria.**

**Comprendo que puedo retirarme del estudio:**

- 1. Cuando quiera**
- 2. Sin tener que dar explicaciones**
- 3. Sin que esto repercuta en mis cuidados médicos**

**Presto libremente mi conformidad para participar en el estudio.**

**Fecha:**

**Paciente: Investigador:**

## **MATERIAL SUPLEMENTARIO**

### **ENCUESTA DE OPINIÓN DIRIGIDA AL PERSONAL DE UCI SOBRE EL RÉGIMEN DE VISITAS EN LA UNIDAD**

**Con el objetivo de conocer la opinión del personal de UCI, familiares y pacientes hemos elaborado la siguiente encuesta sobre el régimen de visitas a pacientes de UCI.**

**Por favor, contesta individual y sinceramente a las siguientes cuestiones.**

**La encuesta es anónima y se informará de los resultados una vez finalizada la recogida y el análisis de los datos.**

**Gracias.**

#### **Datos socio demográficos y personales:**

edad:

sexo:

estado civil:

número de hijos:

categoría profesional:

tipo de contrato:

Años de experiencia profesional:

Años de experiencia en UCI:

### **CUESTIONES PREVIAS**

1.- ¿Has visitado a un familiar cercano en una UCI?

**SÍ**\_\_\_\_ **NO**\_\_\_\_

2.- ¿Estás satisfecha/o con el actual sistema de visitas?

**SÍ**\_\_\_\_ **NO**\_\_\_\_

3.- ¿Te parece que se debería cambiar el horario actual de visitas?

**SI**\_\_\_\_ **NO**\_\_\_\_

4.- ¿Cómo valoras el tiempo destinado a la visita de familiares y allegados en tu Unidad?

1. Muy escaso
2. Escaso
3. Adecuado
4. Amplio
5. Muy amplio

5.- ¿Cuál sería en tu opinión el horario de visitas más adecuado?

1. Restringir el actual.
2. Mantener el actual.
3. Ampliar a 2 horas por la mañana y 2 horas por la tarde.
4. Ampliar desde las 13.00 horas hasta las 21:00 horas, es decir juntar las 2 visitas actuales.
5. Horario libre.



## **CUESTIONES GENERALES**

Dinos tu grado de conformidad con las siguientes cuestiones, **evaluándolas del 1 al 5** , siendo:

**1 muy en desacuerdo**

**2 en desacuerdo**

**3 neutral**

**4 de acuerdo**

**5 muy de acuerdo**

**0 no sabe / no contesta**

- 1.- ¿Crees que el paciente desea más tiempo de visita de sus familiares y allegados?
- 2.- ¿Crees que los familiares y allegados desean más tiempo de visita a los pacientes?
- 3.- ¿Crees que es bueno para los pacientes un mayor tiempo de visita?
- 4.- ¿Crees que es bueno para los familiares y allegados un mayor tiempo de visita?
- 5.- ¿Crees que un mayor tiempo de visita mejora la relación del personal de la Unidad con los familiares?
- 6.- ¿Crees que un mayor tiempo de visita aumenta la confianza de los familiares con el personal de la Unidad?
- 7.- ¿Crees que la presencia de los familiares favorece la recuperación del paciente?
- 8.- ¿Crees que el horario de visitas influye en la satisfacción del paciente y sus familiares con la asistencia recibida durante su estancia en la UCI?
- 9.- ¿Crees que la presencia de familiares genera problemas con el personal de la UCI?
- 10.- ¿Crees que se debe permitir la visita de menores en la UCI?
- 11.- ¿Crees que se debe permitir la libre permanencia de familiares o allegados cuando un paciente está cercano a su fallecimiento?

12.- ¿Crees que se debe permitir la libre permanencia de familiares o allegados cuando un paciente lo necesita?

13.- ¿Crees que se debe permitir la visita fuera de horario de familiares o allegados cuando estos no pueden acudir en los horarios prefijados?

14.- Estarías de acuerdo en que se ampliara el horario actual de visitas permitiéndolas de desde las 13:00 horas hasta las 21:00 horas?

15.- ¿Crees que se debe permitir la presencia de un familiar durante la noche?

16.- ¿Crees que la flexibilización del horario de visitas de UCI conllevaría una pérdida de la intimidad de los pacientes?

**Como profesional que trabajas en una UCI, señala de 1 a 5 tu acuerdo con que un familiar directo que convive con el paciente (esposo/a, hija/o) pueda permanecer en la habitación SI AMBOS (PACIENTE Y FAMILIAR) LO DESEAN, en cada una de las siguientes circunstancias:**

**Valóralo del 1 al 5 siendo:**

**1 MUY EN DESACUERDO**

**2 EN DESACUERDO**

**3 NEUTRAL**

**4 DE ACUERDO**

**5 MUY DE ACUERDO**

**0 NOSABE/ NO CONTESTA**

**1.- Acompañarlo el mayor tiempo posible**

**2.- Cuando el paciente está dormido**

**3.- Cuando el paciente está intubado**

**4.- Cuando el paciente está en coma**

**5.- Cuando esta dolorido**

**6.- Cuando el paciente está agitado**

**7.- Cuando el paciente está comiendo**

**8.- Cuando se está aseando al paciente**

**9.- Cuando se realizan maniobras poco agresivas para el paciente como sacar una analítica, pasar visita médica, canalizar una vía periférica, hacer una ecografía....**

**10.- Cuando hay que realizar maniobras más agresivas como: coger una vía central, intubar, realizar RCP**

**En caso de tener ingresado en UCI a tu familiar más cercano (pareja, hijo, padres...), te gustaría permanecer a su lado en cada una de las siguientes circunstancias?:**

**Valóralo del 1 al 5 siendo**

**1 MUY EN DESACUERDO**

**2 EN DESACUERDO**

**3 NEUTRAL**

**4 DE ACUERDO**

**5 MUY DE ACUERDO**

**0 NOSABE/ NO CONTESTA**

**1.- Me gustaría permanecer a su lado el mayor tiempo posible**

**2.- Cuando mi familiar está dormido**

**3.- Cuando mi familiar está intubado**

**4.- Cuando mi familiar está en coma**

**5.- Cuando esta dolorido**

**6.- Cuando mi familiar está agitado**

**7.- Cuando mi familiar está comiendo**

**8.- Cuando le está aseando al paciente**

**9.- Cuando le realizan maniobras poco agresivas como sacar una analítica, pasar visita médica, canalizar una vía periférica, hacer una ecografía....**

**10.- Cuando hay que realizarle maniobras más agresivas como: coger una vía central, intubar, realizar RCP**

**EXPÓN LOS PROBLEMAS QUE EN TU OPINIÓN SE PUEDEN DERIVAR DE UN HORARIO  
DE VISITAS MÁS FLEXIBLE Y ABIERTO**

---

---

---

---

---

---

---

---

**EXPÓN TUS OBSERVACIONES, SUGERENCIAS Y POSIBLES PROPUESTAS PARA UN  
REGIMEN DE VISITAS MÁS ÓPTIMO**

---

---

---

---

---

---

---

---
